# Supplementary material for: A survey of public attitudes towards third-party reproduction in Japan in 2014
Source: PLoS One. 2018 Oct 31;13(10):e0198499. doi: 10.1371/journal.pone.0198499 (PMC6209135; doi:10.1371/journal.pone.0198499)
Supplement: S1 Table — (XLSX) [file pone.0198499.s003.xlsx]

## Sheet: supplemental table1
Supplemental Table.1 the demographic data of each group respondents (N=2500).
	male				female
Age	20-29	30-39	40-49	50-59	20-29	30-39	40-49	50-59
	A	B	C	D	E	F	G	H
Number	312	313	313	312	312	313	313	312
Marital Status
Unmarried	276 (88.5%)	178 (56.9%)	118 (37.7%)	77 (24.7%)	206 (66.0%)	99 (31.6%)	84 (26.8%)	70 (22.4%)
Married	36 (11.5%)	135 (43.1%)	195 (62.3%)	235 (75.3%)	106 (34.0%)	214 (68.4%)	229 (73.2%)	242 (77.6%)
Number of children
0	285 (91.3%)	206 (65.8%)	165 (52.7%)	84 (26.9%)	234 (75.0%)	159 (50.8%)	127 (40.6%)	83 (26.6%)
1	20 (6.4%)	50 (16.0%)	50 (16.0%)	50 (16.0%)	56 (17.9%)	73 (23.3%)	57 ( 18.2%)	51 (16.3%)
2	4 (1.3%)	44 (14.1%)	78 (24.9%)	123 (39.4%)	17 (5.4%)	66 (21.1%)	99 (31.6%)	130 (41.7%)
3	1 (0.3%)	11 (3.5%)	20 (6.4%)	47 (15.1%)	4 (1.3%)	12 (3.8%)	26 (8.3%)	43 (13.8%)
4	2 (0.6%)	2 (0.6%)	0 (0.0%)	7 (2.2%)	1 (0.3%)	2 (0.6%)	3 (1.0%)	4 (1.3%)
more than 4	0 (0.0%)	0 (0.0%)	0 (0.0%)	1 (0.3%)	0 (0.0%)	1 (0.3%)	1 (0.3%)	1 (0.3%)
Annual family income(yen/year)
less than 1,000,000	39 (12.5%)	14 (4.5%)	14 (4.5%)	14 (4.5%)	29 (9.3%)	13 (4.2%)	10 (3.2%)	12 (3.8%)
1,000,000-3,000,000	56 (17.9%)	56 (17.9%)	37 (11.8%)	36 (11.5%)	82 (26.3%)	49 (15.7%)	52 (16.6%)	44 (14.1%)
3,000,000-5,000,000	97 (31.1%)	105 (33.5%)	92 (29.4%)	51 (16.3%)	90 (28.8%)	107 (34.2%)	85 (27.2%)	59 (18.9%)
5,000,000-7,000,000	55 (17.6%)	73 (23.2%)	87 (27.8%)	61 (19.6%)	51 (16.3%)	86 (27.5%)	79 (25.2%)	79 (25.3%)
7,000,000-10,000,000	33 (10.6%)	45 (14.4%)	55 (17.6%)	90 (28.8%)	39 (12.5%)	42 (13.4%)	57 (18.2%)	56 (17.9%)
10,000,000-15,000,000	21 (6.7%)	18 (5.8%)	23 (7.3%)	47 (15.1%)	15 (4.8%)	14 (4.5%)	21 (6.7%)	41 (13.1%)
15,000,000-	11 (3.5%)	2 (0.6%)	5 (1.6%)	13 (4.2%)	6 (1.9%)	2 (0.6%)	9 (2.9%)	21 (6.7%)
Education
Junior high school	13 (4.2%)	11 (3.5%)	7 (2.2%)	5 (1.6%)	16 (5.1%)	8 (2.6%)	4 (1.3%)	4 (1.3%)
High school	86 (27.6%)	72 (23.0%)	78 (24.9%)	72 (23.1%)	66 (21.2%)	65 (20.8%)	89 (28.4%)	117 (37.5%)
Technical college	42 (13.5%)	52 (16.6%)	50 (16.0%)	33 (10.6%)	45 (14.4%)	64 (20.4%)	50 (16.0%)	31 (9.9%)
Junior college	1 (0.3%)	6 (1.9%)	4 (1.3%)	5 (1.6%)	27 (8.7%)	57 (18.2%)	90 (28.8%)	85 (27.2%)
University or grauate school	170 (54.5%)	172 (55.0%)	174 (55.6%)	197 (63.1%)	157 50.3%)	119 (38.0%)	80 (25.6%)	75 (24.0%)
Others	0 (0.0%)	0 (0.0%)	0 (0.0%)	0 (0.0%)	1 (0.3%)	0 (0.0%)	0 (0.0%)	0 (0.0%)
Experience of infertility
Yes	7 (2.2%)	30 (9.6%)	50 (16.0%)	35 (11.2%)	26 (8.3%)	78 (24.9%)	81 (25.9%)	51 (16.3%)
None	305 (97.8%)	283 (90.4%)	263 (84.0%)	277 (88.8%)	286 (91.7%)	235 (75.1%)	232 (74.1%)	261 (83.7%)
Experience of infertility treatment
None	304 (97.4%)	285 (91.1%)	283 (90.4%)	294 (94.2%)	299 (95.8%)	259 (82.7%)	257 (82.1%)	278 (89.1%)
Timed intercourse	8 (2.6%)	25 (8.0%)	20 (6.4%)	14 (4.5%)	12 (3.8%)	52 (16.6%)	48 (15.3%)	27 (8.7%)
IUI (intrauterine insemination)	1 (0.3%)	10 (3.2%)	10 (3.2%)	3 (1.0%)	2 (0.6%)	19 (6.1%)	16 (5.1%)	16 (5.1%)
IVF-ET (in vitro fertilization-embryo transfer)	1 (0.3%)	5 (1.6%)	11 (3.5%)	0 (0.0%)	0 (0.0%)	6 (1.9%)	16 (5.1%)	5 (1.6%)
ICSI (intracytoplasmic sperm injection)	0 (0.0%)	3 (1.0%)	7 (2.2%)	3 (1.0%)	0 (0.0%)	4 (1.3%)	12 (3.8%)	2 (0.6%)
